# Supplementary material
Source: publisher site journal article supplement (https://www.spandidos-publications.com/5103/downloadSupplementary)
Supplement: Supplementary file 1 [file downloadSupplementary]

## Sheet: Table S6
Table SVI. Univariate Cox expression analysis of DNASE1L2.
Cancer	HR	HR.95L	HR.95H	P-value
ACC	1.19419	0.799332	1.7841	0.386248
BLCA	0.635007	0.458123	0.880187	0.00640938
BRCA	1.00358	0.726786	1.38578	0.982698
CESC	0.528457	0.284382	0.982012	0.0436559
CHOL	2.17144	0.753674	6.2562	0.150953
COAD	1.58385	1.05059	2.38777	0.0281208
DLBC	1.0157	0.247736	4.16427	0.982739
ESCA	1.22108	0.630334	2.36546	0.553834
GBM	0.801337	0.54181	1.18518	0.26737
HNSC	1.12013	0.834194	1.50407	0.45061
KICH	1.85899	0.552906	6.25035	0.316257
KIRC	2.53804	1.65072	3.90234	2.20031e-05
KIRP	1.74288	0.798052	3.80633	0.163335
LAML	0.80621	0.439301	1.47957	0.486827
LGG	0.692841	0.487792	0.984086	0.0404073
LIHC	0.92274	0.639691	1.33103	0.667076
LUAD	0.773835	0.489049	1.22446	0.27348
LUSC	0.924663	0.6242	1.36976	0.696045
MESO	3.82471	1.68643	8.67417	0.00132342
OV	1.12241	0.740018	1.70241	0.586889
PAAD	0.41295	0.238197	0.71591	0.00163035
PCPG	2.61397	0.473853	14.4197	0.270117
PRAD	1.53657	0.563747	4.18813	0.401111
READ	1.09438	0.404082	2.96394	0.859177
SARC	1.38212	0.799133	2.39041	0.246958
SKCM	1.13312	0.831847	1.5435	0.428078
STAD	0.409415	0.196848	0.851521	0.0168413
TGCT	0.429626	0.00359235	51.3809	0.729256
THCA	1.09961	0.668366	1.8091	0.70855
THYM	0.453378	0.130501	1.5751	0.213152
UCEC	0.865577	0.588406	1.27331	0.463536
UCS	1.56033	0.739847	3.29072	0.242585
UVM	4.69022	0.347596	63.2865	0.244404
